# Supplementary material
Source: PubMed Central journal article supplement (PMC8592551)
Supplement: jci-131-144871-s089.pdf [file jci-131-144871-s089.pdf]

1 **El-Houjeiri and Biondini et.al 2020 Supplementary Figures and Tables legends**

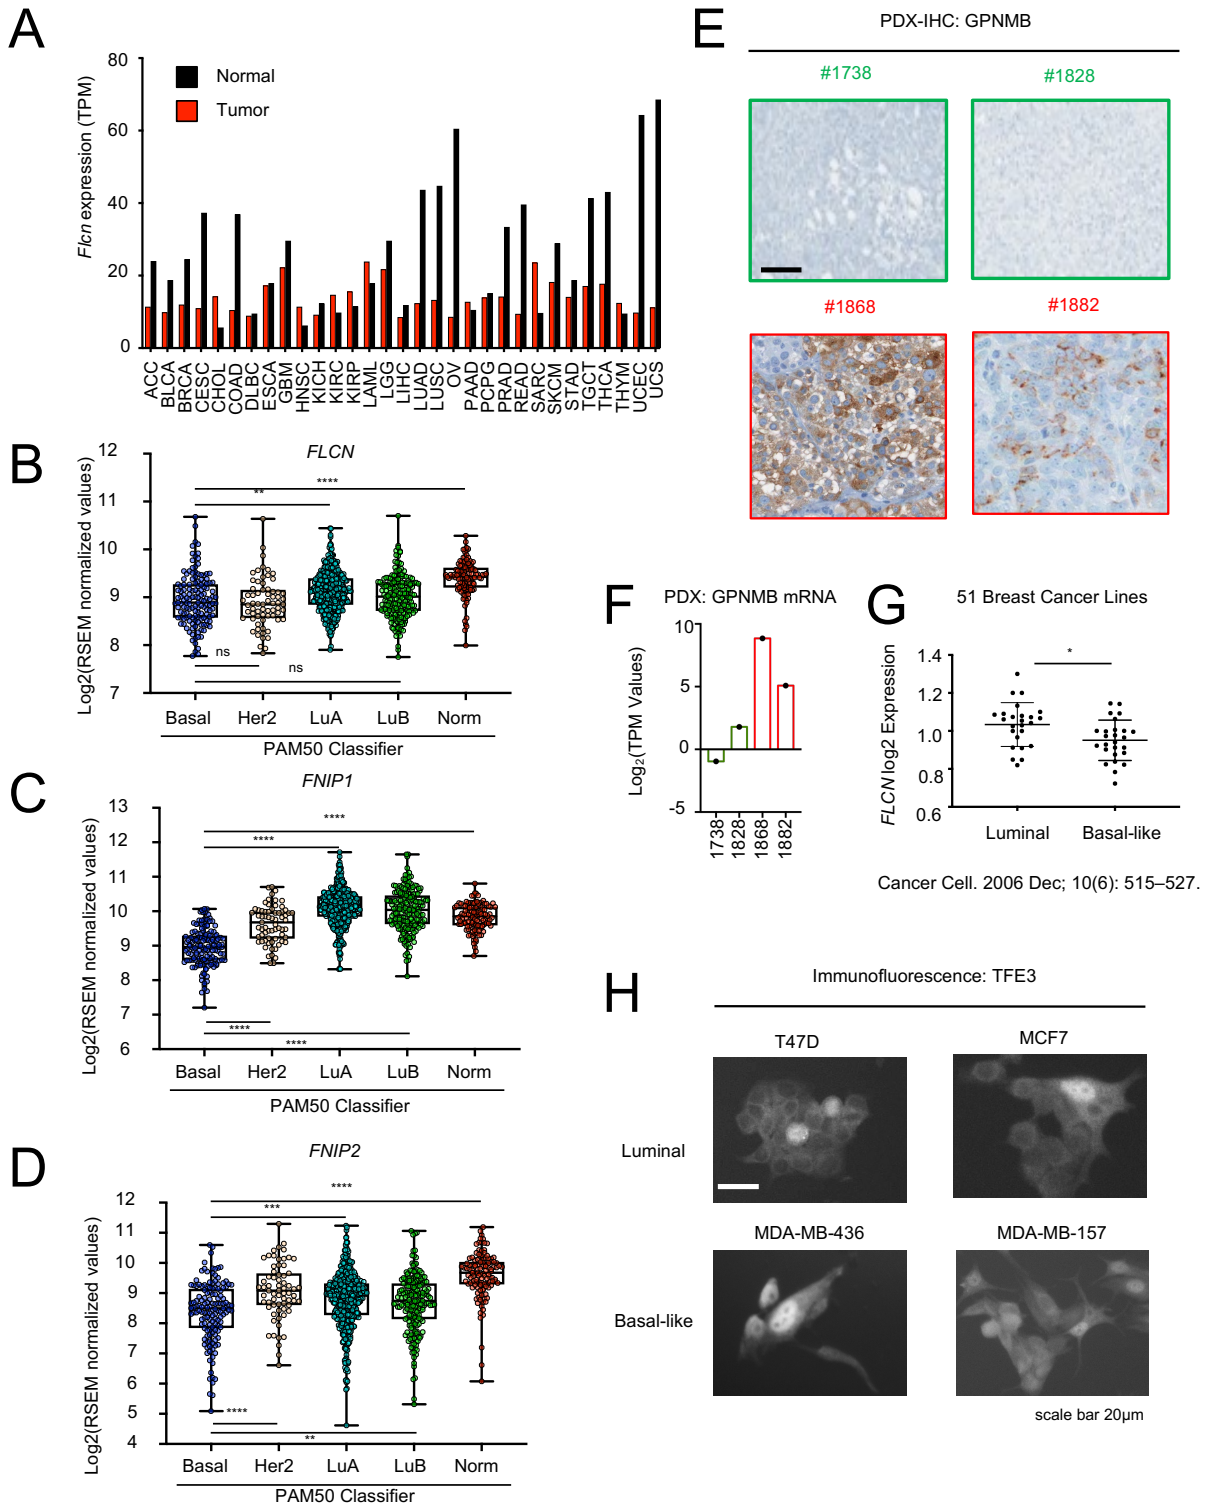

2

3 **Supplemental Figure 1 (related to Figure 1).** FLCN, FNIP1 and FNIP2 are downregulated in  
4 basal-like breast cancer models compared to luminal subtypes. (A) FLCN gene expression profile  
5 across different tumor samples and paired normal tissues from TCGA dataset  
6 (<http://gepia2.cancer-pku.cn/#general>). The height of each bar represents the median expression in  
7 the specified tumor types or normal tissue. ACC: Adrenocortical carcinoma; BLCA: Bladder  
8 Urothelial Carcinoma; BRCA: Breast invasive carcinoma; CESC: Cervical squamous cell  
9 carcinoma and endocervical adenocarcinoma; CHOL: Cholangiocarcinoma; LCML: Chronic  
10 Myelogenous Leukemia; COAD: Colon adenocarcinoma; CNTL: Controls; ESCA: Esophageal  
11 carcinoma; FPPP: FFPE Pilot Phase II; GBM: Glioblastoma multiform, HNSC: Head and Neck  
12 squamous cell carcinoma; KICH: Kidney Chromophobe; KIRC: Kidney renal clear cell  
13 carcinoma; KIRP: Kidney renal papillary cell carcinoma; LGG: Brain Lower; Grade Glioma;  
14 LIHC: Liver hepatocellular carcinoma; LUAD: Lung adenocarcinoma; LUSC: Lung squamous  
15 cell carcinoma; DLBC: Lymphoid Neoplasm Diffuse Large B-cell Lymphoma; MESO:  
16 Mesothelioma; MISC: Miscellaneous; OV: Ovarian serous cystadenocarcinoma; PAAD:  
17 Pancreatic adenocarcinoma; PCPG: Pheochromocytoma and Paraganglioma; PRAD: Prostate  
18 adenocarcinoma; READ: Rectum adenocarcinoma; SARC: Sarcoma; SKCM: Skin Cutaneous  
19 Melanoma; STAD: Stomach adenocarcinoma; TGCT: Testicular Germ Cell Tumors; THYM:  
20 Thymoma; THCA: Thyroid carcinoma; UCS: Uterine Carcinosarcoma. (B-D) Expression levels  
21 22 of FLCN (B), FNIP1 (C) and FNIP2 (D) in the different molecular subtypes of breast cancer in  
22 the TCGA dataset, as defined by the PAM50/AIMS (prediction analysis of microarray 50) gene  
23 signature. Significance was determined using one-way ANOVA with application of the Bonferroni  
24 correction (\*\* $p < 0.01$ , \*\*\* $p < 0.001$ , \*\*\*\* $p < 0.0001$ ). (E) Immunohistochemistry analysis of human  
25 GPNMB for the selected patient derived xenografts (PDXs) representing the functional

26 FLCN/FNIP1/2 complex in green (1738 and 1828) and the deregulated FLCN-FNIP1/2 complex  
27 in red (1868 and 1882). Scale bar represents 50  $\mu$ m. (F) Transcript levels of human *GPNMB* in the  
28 selected patient-derived xenografts (PDXs) indicated in (E). (G) FLCN expression levels in 51  
29 different breast cancer cell lines stratified into luminal and basal subtypes, data was obtained and  
30 analyzed from Cancer Cell. 2006 Dec; 10(6): 515–527. (H) Representative immunofluorescence  
31 images showing the localization of TFE3 in luminal (T47D and MCF7) and Triple negative breast  
32 cancer (TNBC) (MDA-MB-436 and MD-MB-157) cells. Scale bar represents 20 $\mu$ m.

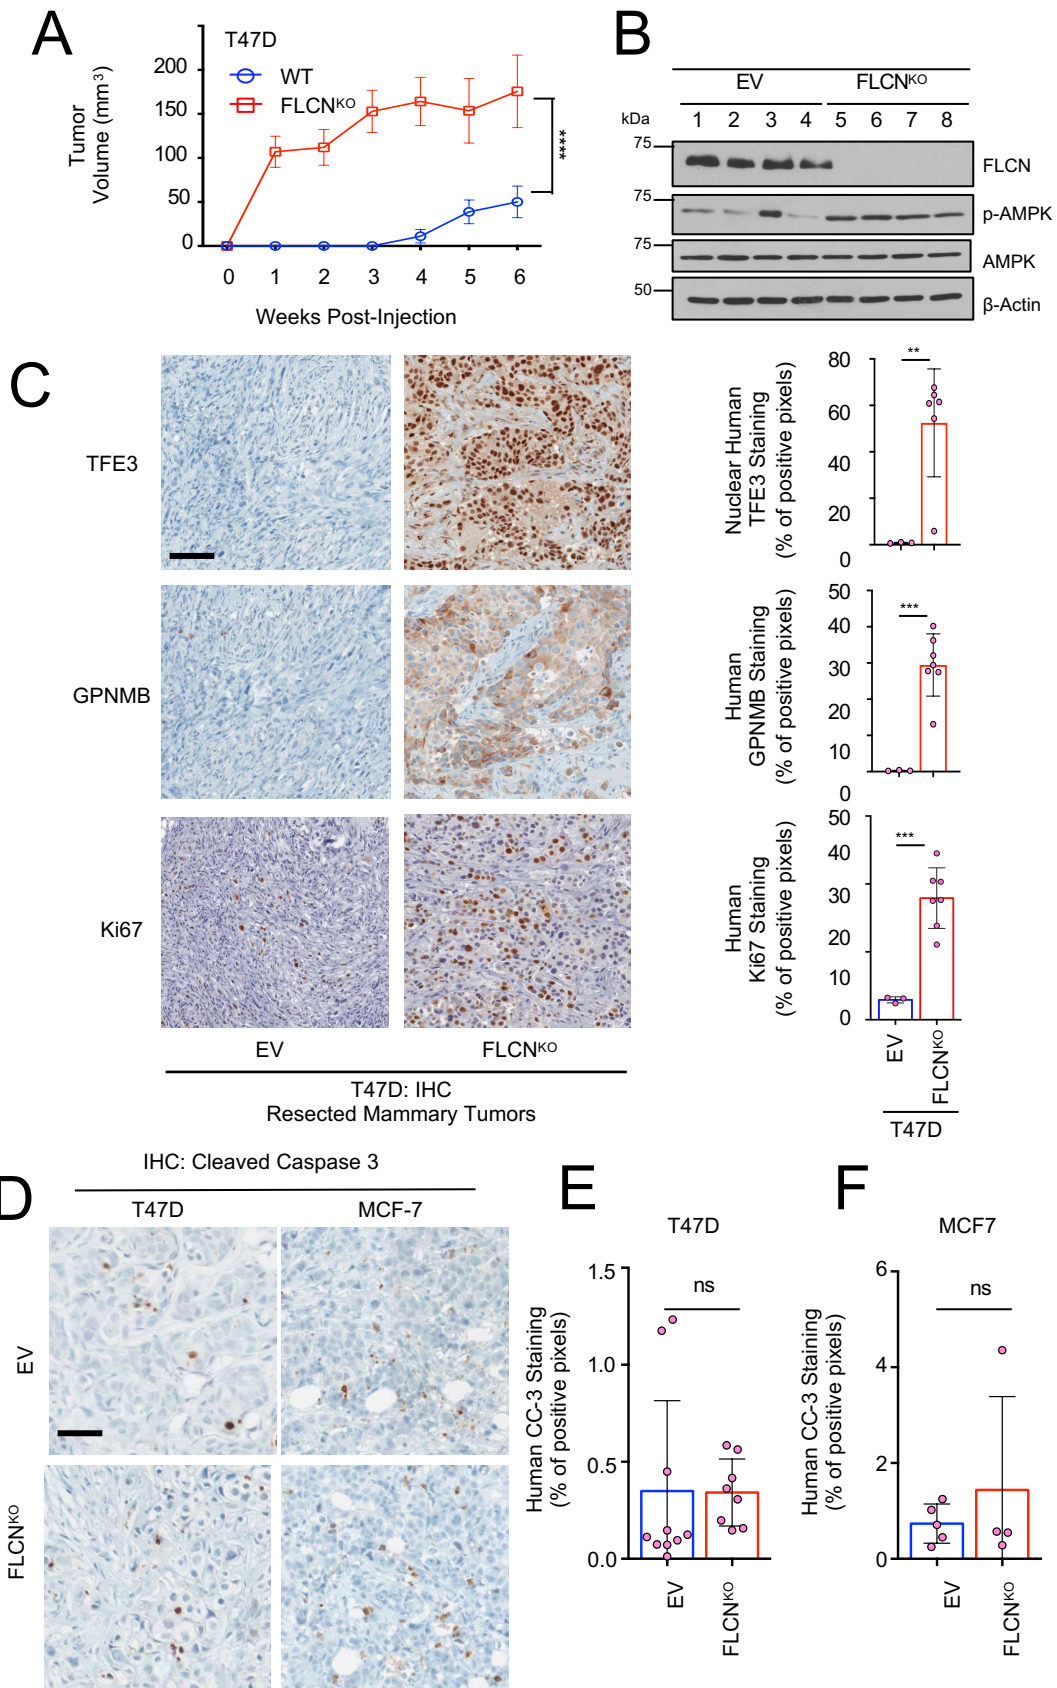



34 **Supplemental Figure 2** (related to Figure 4). **Loss of FLCN in luminal breast cancer cells**  
35 **enhances tumor growth.** (A) Growth curves of tumors of empty vector (EV) (blue) and FLCN  
36 knock out (FLCN<sup>KO</sup>) (red) T47D cells injected in mammary fat pad (MFP) of NSG mice over the  
37 course of 7 weeks. Data represents the mean volumes of mice in each cohort measured each week  
38 (n=10 in each cohort) ± SEM. Significance was determined using repeated measures one-way  
39 ANOVA on prism (\*\*\*\*p<0.0001). (B) Immunoblot analysis of EV and FLCN<sup>KO</sup> T47D tumor  
40 lysates resected 7 weeks post-injection. Four representative samples were run from each cohort.  
41 Actin was used as a loading control. (C) Representative images of the immunohistochemistry  
42 (IHC) staining for TFE3, GPNMB and Ki67 of EV and FLCN<sup>KO</sup> re-expressing FLCN T47D  
43 tumors resected 7 weeks post-injection. Scale bar represents 50 μm (left). Quantification of IHC  
44 results showing the percentage TFE3 nuclear localization, positive GPNMB staining and positive  
45 Ki67 staining, in the EV and FLCN<sup>KO</sup> T47D tumors (right). Data represents mean quantifications  
46 of IHC images from at least 3 different mice ± SEM. Significance was determined using Student's  
47 t-test (\*\*\*p<0.001, \*\*p<0.01). (D) Representative IHC of cleaved caspase-3 staining in EV and  
48 FLCN<sup>KO</sup> tumors resected from mice injected with T47D or MCF7 cells on week 6 and 5,  
49 respectively. Scale bar represents 50 μm. Quantification of IHC results showing the positive  
50 cleaved caspase-3 staining in T47D and MCF7 cells, in the EV and FLCN<sup>KO</sup> tumors. Data  
51 represents mean quantifications of IHC images from at least 3 different mice ± SEM. Significance  
52 was determined using Student's t-test (ns=non-significant).

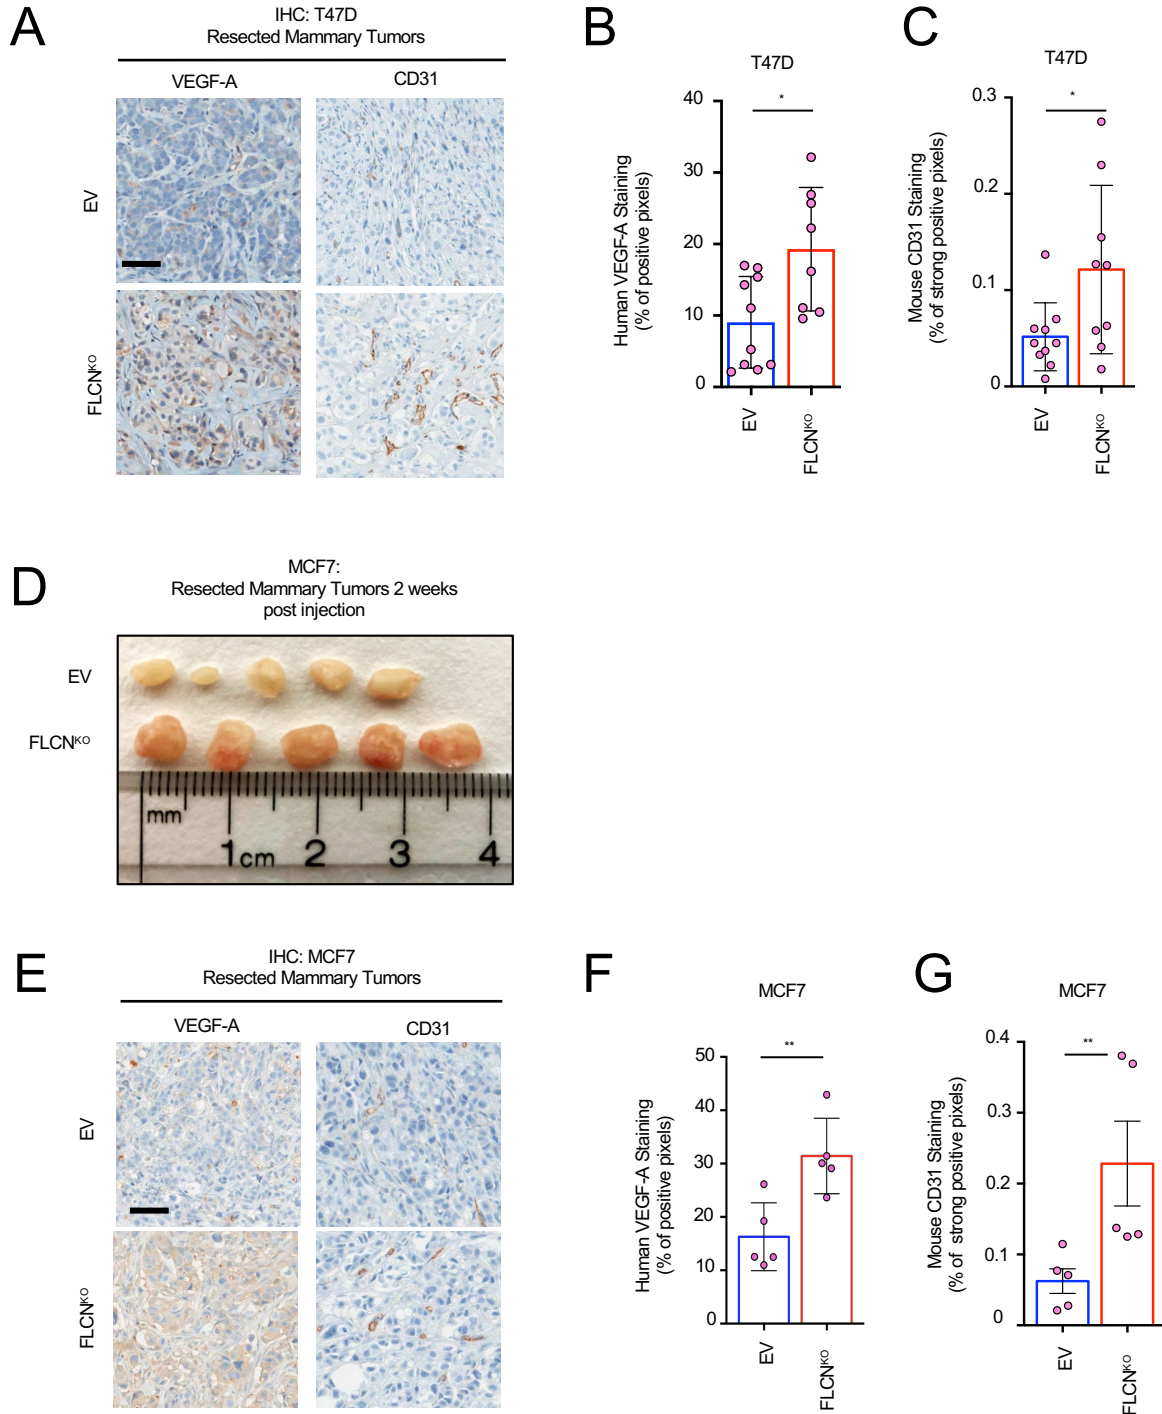

53

54 **Supplemental Figure 3 (related to Figure 5). Loss of FLCN in luminal breast cancer cells**

55 **induces an angiogenic response.** (A) Representative images of the immunohistochemistry (IHC)

56 staining for human VEGF-A and mouse CD31 of empty vector (EV) and FLCN knock out

57 (FLCN<sup>KO</sup>) T47D tumors resected 7 weeks post-injection. Scale bar represents 50  $\mu$ m. (B, C)  
 58 Quantification of IHC results in (A) showing % positive VEGF-A staining (B) and positive CD31  
 59 staining (C) in EV and FLCN<sup>KO</sup> T47D tumors. Data represents mean quantifications of IHC images  
 60 from at least 9 different mice  $\pm$  SEM. Significance was determined using Student's t-test  
 61 (\*\*p<0.01). (D) Photograph image of MCF7 EV and FLCN<sup>KO</sup> mammary fat pad tumors resected  
 62 2 weeks post-injection. (E) Representative images of the immunohistochemistry (IHC) staining  
 63 for human VEGF-A of EV and mouse CD31 and FLCN<sup>KO</sup> tumors resected 2 weeks post-injection.  
 64 Scale bar represents 50  $\mu$ m. (F) Quantification of IHC results in (E) showing % positive VEGF-A  
 65 staining (F) and positive CD31 staining (G) in EV and FLCN<sup>KO</sup> MCF7 tumors. Data represents  
 66 mean quantifications of IHC images from at least 5 different mice  $\pm$  SEM. Significance was  
 67 determined using Student's t-test (\*\*p<0.01). Heatmap representing differential gene expression of  
 68 tumor secreted chemoattractants in WT and FLCN<sup>KO</sup> MCF7 tumors following RNA-sequencing  
 69 analysis. Each column represents a different mouse from each cohort, where blue is WT and red  
 70 is FLCN<sup>KO</sup>. Fold increase was normalized against EV and color-coded (dark red indicates 3-fold  
 71 or more increase, light green indicates 3-fold or more decrease, black indicates no change).

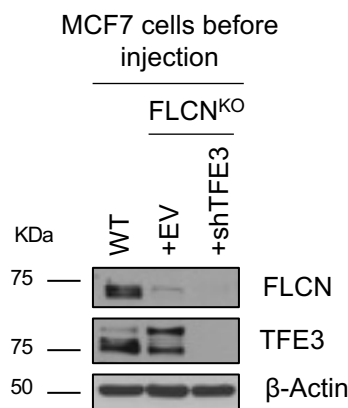

72  
 73 **Supplemental Figure 4** (related to Figure 6). **Validation of TFE3 and FLCN levels in MCF7**  
 74 **breast cancer cells prior to injection.** (A) Immunoblot analysis of TFE3 and FLCN levels in wild

75 type (WT), FLCN KO (FLCN<sup>KO</sup>) +EV, and FLCN KO +shTFE3 MCF7 cells before injection.  
 76 Actin was used as a loading control.

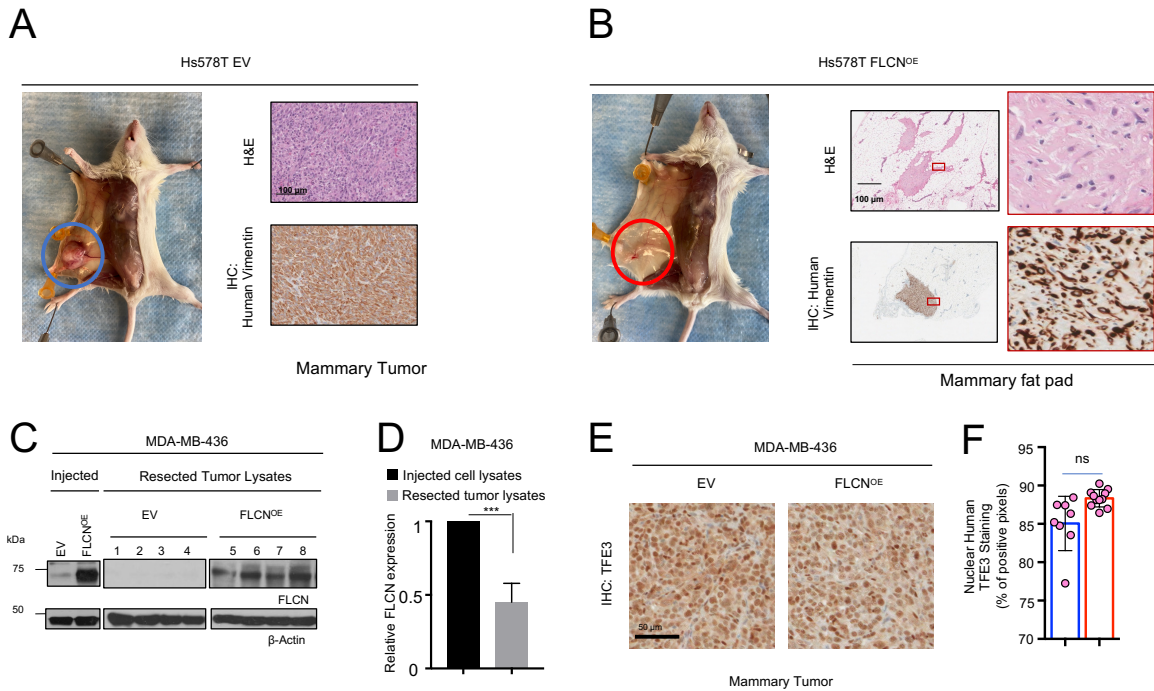

77  
 78 **Supplemental Figure 5** (related to Figure 8). **FLCN overexpression in basal-like breast cancer**  
 79 **cells.** (A) Representative images of mice injected with Hs578T empty vector (EV) cells,  
 80 highlighting the tumor in the mammary fat pad (blue circle, left image). Representative images of  
 81 H&E and immunohistochemistry (IHC) staining for human vimentin in Hs578T EV cells tumors  
 82 resected 6 weeks post-injection (right). Scale bar represents 100 μm. (B) Representative images of  
 83 mice injected with Hs578T FLCN overexpressing (FLCN<sup>OE</sup>) cells, highlighting the mammary fat  
 84 pad containing residual cancer cells (red circle, left image). Representative images of H&E and  
 85 IHC staining for human vimentin, revealing residual cancer cells, in the mammary fat pad of the  
 86 mice injected with Hs578T FLCN<sup>OE</sup> cells resected 6 weeks post-injection (right). Scale bar  
 87 represents 100 μm. (C) Immunoblot analysis of EV and FLCN<sup>OE</sup> MDA-MB-436 cells prior to  
 88 injection (this blot is identical to the one used in Figure 8A) and in end-stage tumors. Four

89 representative samples were run from the FLCN<sup>OE</sup> MDA-MB-436 tumors.  $\beta$ -Actin was used as a  
 90 loading control. (D) Relative FLCN expression in samples indicated in (C) as quantified by  
 91 ImageJ. Significance was determined using Student's t-test (\*\*\*) $p < 0.001$ . (E) Representative  
 92 images of IHC staining for human TFE3 in EV and FLCN<sup>OE</sup> MDA-MB-436 tumors in end-stage  
 93 tumors (left). Scale bar represents 50  $\mu$ m. (F) Quantitative analysis of the IHC results in (E),  
 94 showing the % of TFE3 nuclear localization in EV and FLCN<sup>OE</sup> MDA-MB-436 cells. Results  
 95 represent the mean of the results from at least 7 mice  $\pm$  SEM. Significance was determined using  
 96 Student's t-test (ns=non-significant).

97

98 **Supplemental Table 1** (related to Figures 2, 3, 5, and 7): Oligonucleotide sequences of the human  
 99 primers used for qPCR

| Gene                            | Forward primer           | Reverse primer           |
|---------------------------------|--------------------------|--------------------------|
| <i>ATP6V0E1</i>                 | CTCACTGTGCCTCTCATTGTG    | CACCAACATGGTAATGATAACTCC |
| <i>ASAHI</i>                    | AGTTGCGTCGCCTTAGTCCT     | TGCACCTCTGTACGTTGGTC     |
| <i>TPPI</i>                     | GGGAGGACCAGGAGCAT        | GGGCCTAGAGAGCTCAGAAT     |
| <i>MCOLINI</i>                  | TAGCGACTGCCTTCGACCC      | GCCCTTTTCTCCACCGTGA      |
| <i>TFEB</i>                     | CGGACAGATTGACCTTCAGAG    | GCTGCTGCTGTTGCATATAAT    |
| <i>TFE3</i>                     | CCGTGTTTCGTGCTGTTGGA     | CTCGTAGAAGCTGTCAGGAT     |
| <i>SLCA1</i>                    | GAAGCAGTGGCAGCGGTGTTTATT | ATGTGGCCGTGATACTGATGGTGA |
| <i>LDHA</i>                     | CTCCAAGCTGGTCATTATCACG   | AGTTCGGGCTGTATTTTACAACA  |
| <i>HK-2</i>                     | GAGCCACCACTCACCTACT      | ACCCAAAGCACACGGAAGTT     |
| <i>ATPV1C1</i>                  | ATTGCATGCGGCAACTTCAA     | CCAAGACATCCAACGTGCCA     |
| <i>PGC1-<math>\alpha</math></i> | GTGTGTGCTGTGTG TCAGAGTGG | GAGTCTTGGCTGCACATGTCCC   |

|               |                       |                       |
|---------------|-----------------------|-----------------------|
| <i>ATP5J</i>  | TCAGCCGTCTCAGTCCATTT  | CCAAACATTTGCTTGAGCTT  |
| <i>PGC1-β</i> | CTCTTCACCCTGCCACTCC   | ACCTCGCACTCCTCAATCTC  |
| <i>VEGF-α</i> | AGGCCAGCACATAGGAGAGA  | TACCGGGATTTCTTGCGCTT  |
| <i>ENO1</i>   | CTGGTGCCGTTGAGAAGGG   | GGTTGTGGTAAACCTCTGCTC |
| <i>TBP</i>    | AGGGTTTCTGGTTTGCCAAGA | CTGAATAGGCTGTGGGGTCA  |

100

101 **Supplemental Table S2** (related to Figure 5). RNA-sequencing results of the complete list of  
102 differentially expressed genes in wild type (WT) compared to FLCN knock out (FLCN<sup>KO</sup>) MCF7  
103 cells.

104

105 **Supplemental Table S3** (related to Figure 5). Complete GO enrichment list in FLCN knock out  
106 (FLCN<sup>KO</sup>) MCF7 cells through enrichment of functionally annotated gene sets among the  
107 differentially expressed genes.

108

109

110

111
